# Supplementary material for: Dioxin Receptor Adjusts Liver Regeneration After Acute Toxic Injury and Protects Against Liver Carcinogenesis
Source: PubMed Central journal article supplement (PMC5585208; doi:10.1038/s41598-017-10984-w), 2017-09-05
Supplement: 41598_2017_10984_MOESM1_ESM.pdf [file 41598_2017_10984_MOESM1_ESM.pdf]

**DIOXIN RECEPTOR ADJUSTS LIVER REGENERATION AFTER ACUTE  
TOXIC INJURY AND PROTECTS AGAINST LIVER CARCINOGENESIS**

**Nuria Moreno-Marín<sup>1</sup>, Eva Barrasa<sup>1</sup>, Antonio Morales-Hernández<sup>2</sup>, Beroé  
Paniagua<sup>1</sup>, Gerardo Blanco-Fernández<sup>3</sup>, Jaime M. Merino<sup>1</sup> and Pedro M.  
Fernández-Salguero<sup>1,\*</sup>**

Supplementary Table 1

*Oligonucleotide primers used in this study*

| Gene name                     | Direction | Primer sequence (5'-3') |
|-------------------------------|-----------|-------------------------|
| <i>Axin 2</i>                 | forward   | ACTGGGTCGCTTCTCTTGAA    |
|                               | reverse   | CTCCCCACCTTGAATGAAGA    |
| <i><math>\beta</math>-Cat</i> | forward   | CCCTGAGACCCTACATGAGG    |
|                               | reverse   | TGTCAGCTCAGGAATTGGAC    |
| <i>c-Jun</i>                  | forward   | TGAGTTGGCACCCACTGTTA    |
|                               | reverse   | TCCCCTATCGACATGGAGTC    |
| <i>Cyclin-D</i>               | forward   | CACA ACTTCTCGGCAGTCAA   |
|                               | reverse   | AGTGCGTGCAGAAGGAGATT    |
| <i>Dkk1</i>                   | forward   | GCAGGTGTGGAGCCTAGAAG    |
|                               | reverse   | GCCTCCGATCATCAGACTGT    |
| <i>Lef1</i>                   | forward   | GGGTGTTCTCTGGCCTTGT     |
|                               | reverse   | GCGACTTAGCCGACATCAA     |
| <i>Lrp6</i>                   | forward   | CTTTCTCGGGGTTTACCACA    |
|                               | reverse   | TGCAA ACTCAGTCGCAAATC   |
| <i>Mmp2</i>                   | forward   | GCATTGGGTATCCATCCATC    |
|                               | reverse   | AGTCAGGGTCACCCACAAAG    |
| <i>Tcf4</i>                   | forward   | GTGACCCAAGATCCCTGCT     |
|                               | reverse   | CTTCTTTGGCGAGTGGACA     |
| <i>Cyp11a1</i>                | forward   | ACAGACAGCCTCATTGAGCA    |
|                               | reverse   | GGCTCCACGAGATAGCAGTT    |
| <i>Gapdh</i>                  | forward   | TGAAGCAGGCATCTGAGGG     |
|                               | reverse   | CGAAGGTGGAAGAGTGGGAG    |
